# Supplementary material for: Exploring the role of vacancy defects in the optical properties of LiMgPO4
Source: Royal Society of Chemistry journal article supplement (doi:10.1039/d0cp02425b), 2020-01-01
Supplement: d0cp02425b1.pdf [file d0cp02425b1.pdf]

**Electronic supplementary information (ESI)**

**Exploring the Role of Vacancy Defects on the Optical Properties of LiMgPO<sub>4</sub>**

Pampa Modak<sup>1,2</sup> Brindaban Modak\*,<sup>2,3</sup>

<sup>1</sup>RSD, Atomic Energy Regulatory Board, <sup>2</sup>Homi Bhabha National Institute, Mumbai 400 094

<sup>3</sup>Theoretical Chemistry Section, Bhabha Atomic Research Centre, Mumbai 400 085, India

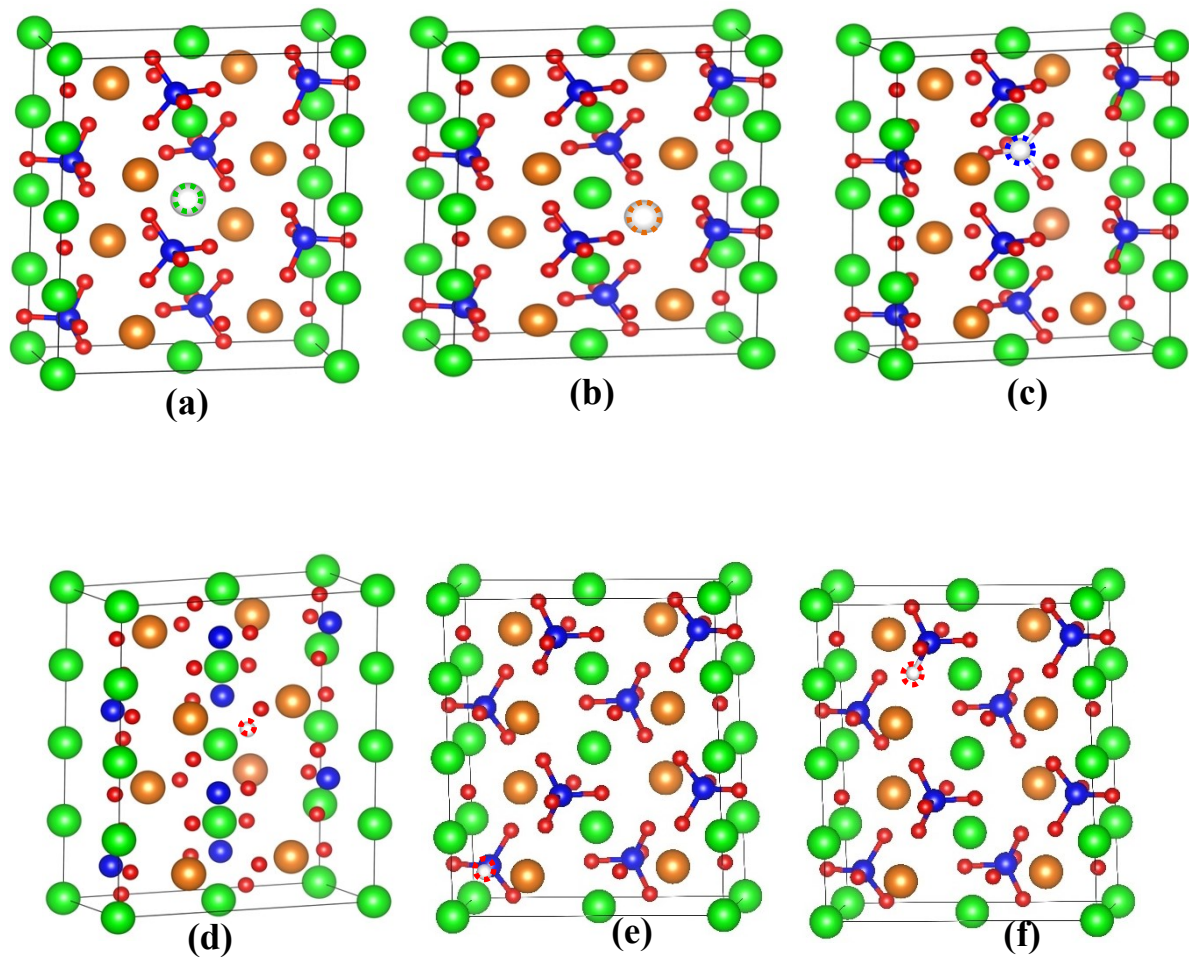

**Fig. S1:** Crystal Structure of  $\text{LiMgPO}_4$  with (a)  $V_{\text{Li}}^0$ , (b)  $V_{\text{Mg}}^0$ , (c)  $V_{\text{P}}^0$ , (d)  $V_{\text{O1}}^0$ , (e)  $V_{\text{O2}}^0$ , and (f)  $V_{\text{O3}}^0$ .

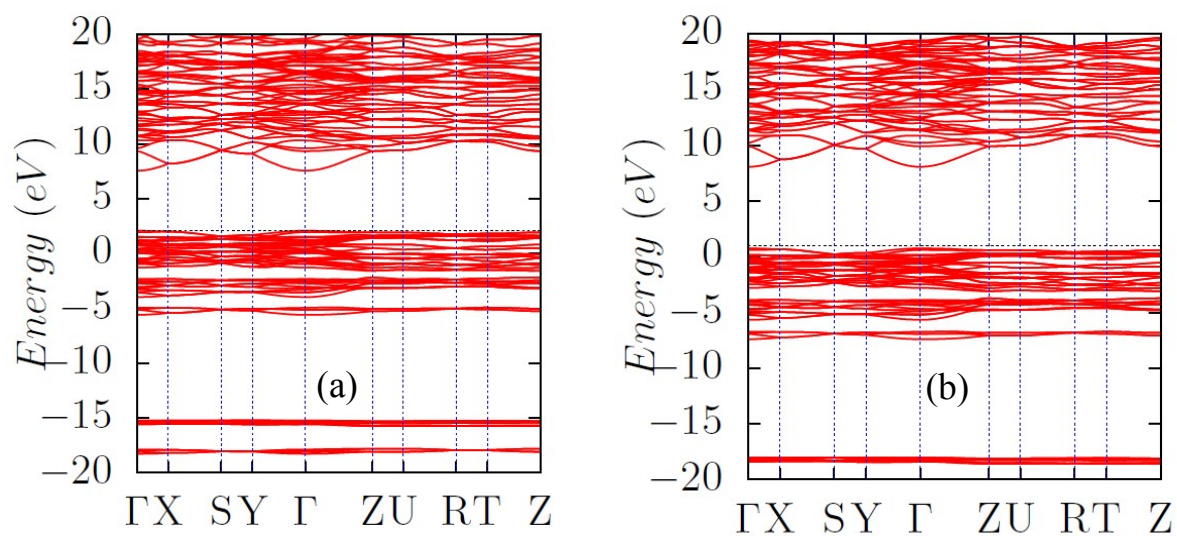

**Fig. S2:** Band structure of LiMgPO<sub>4</sub> using different exchange correlation functionals (a) PBE, (b) HSE06. Horizontal dashed lines indicate Fermi level.

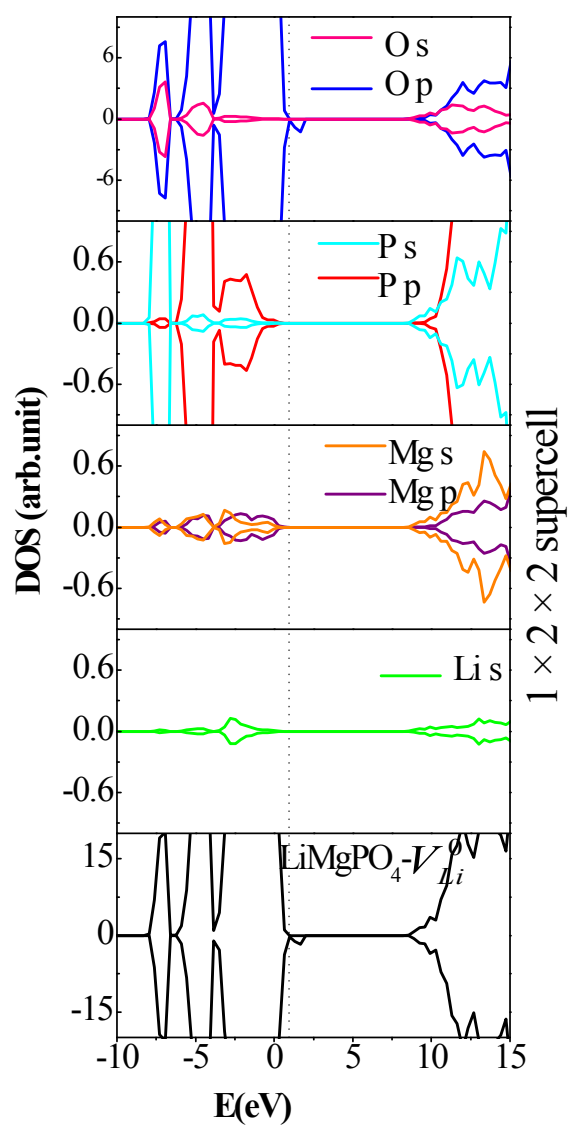

**Fig. S3:** Density of states of  $\text{LiMgPO}_4$  containing one neutral Li vacancy using  $1 \times 2 \times 2$  supercell. Vertical dashed lines indicate Fermi level.

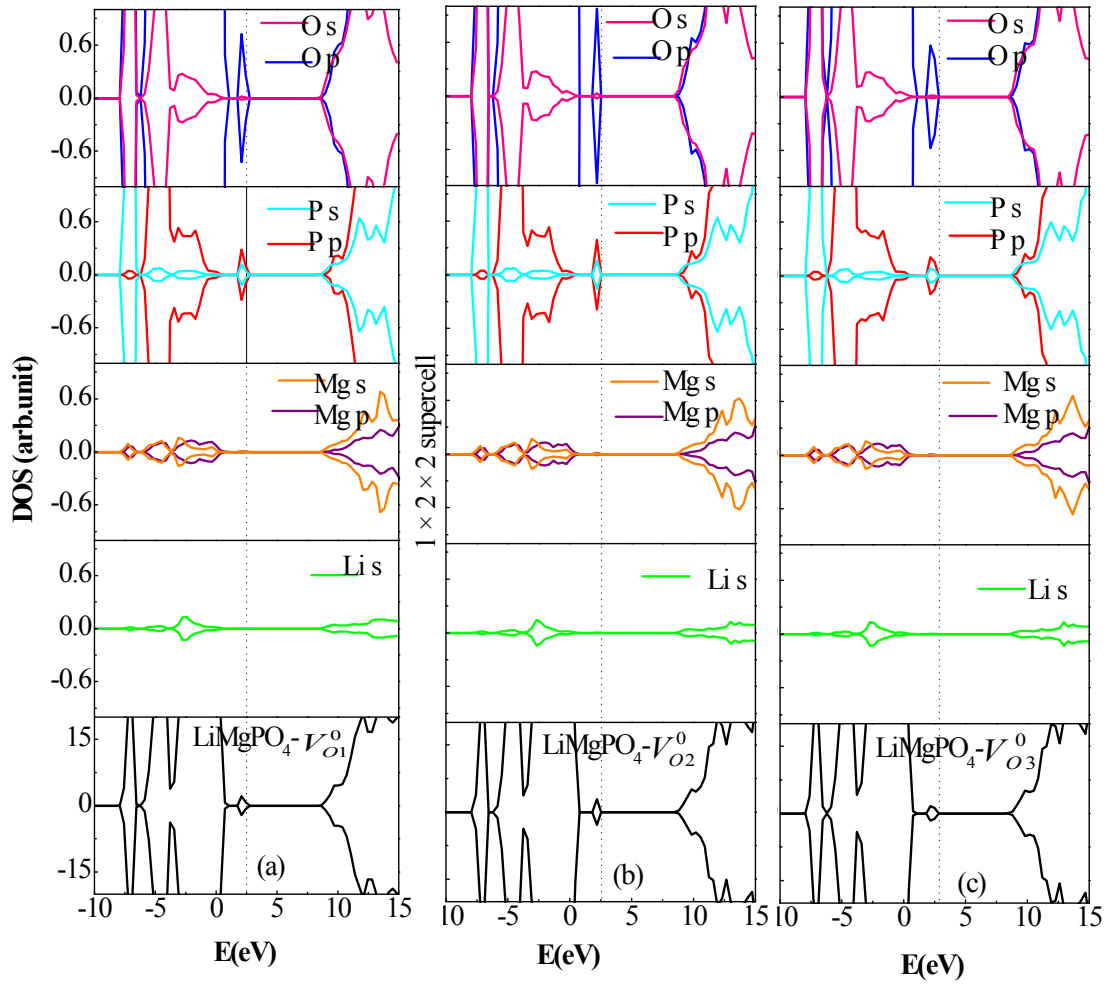

**Fig. S4:** Density of states of  $\text{LiMgPO}_4$  containing one neutral O vacancy at (a) O1 lattice site (b) O2 lattice site and (c) O3 lattice site using  $1 \times 2 \times 2$  supercell. Vertical dashed lines indicate Fermi level.
